# Supplementary material for: Upregulation of the Long Noncoding RNA CASC10 Promotes Cisplatin Resistance in High-Grade Serous Ovarian Cancer
Source: MDPI journal article supplement (doi:10.3390/ijms23147737), 2022-07-13
Supplement: s1 [file s1]

OS

PFS

OS

PFS

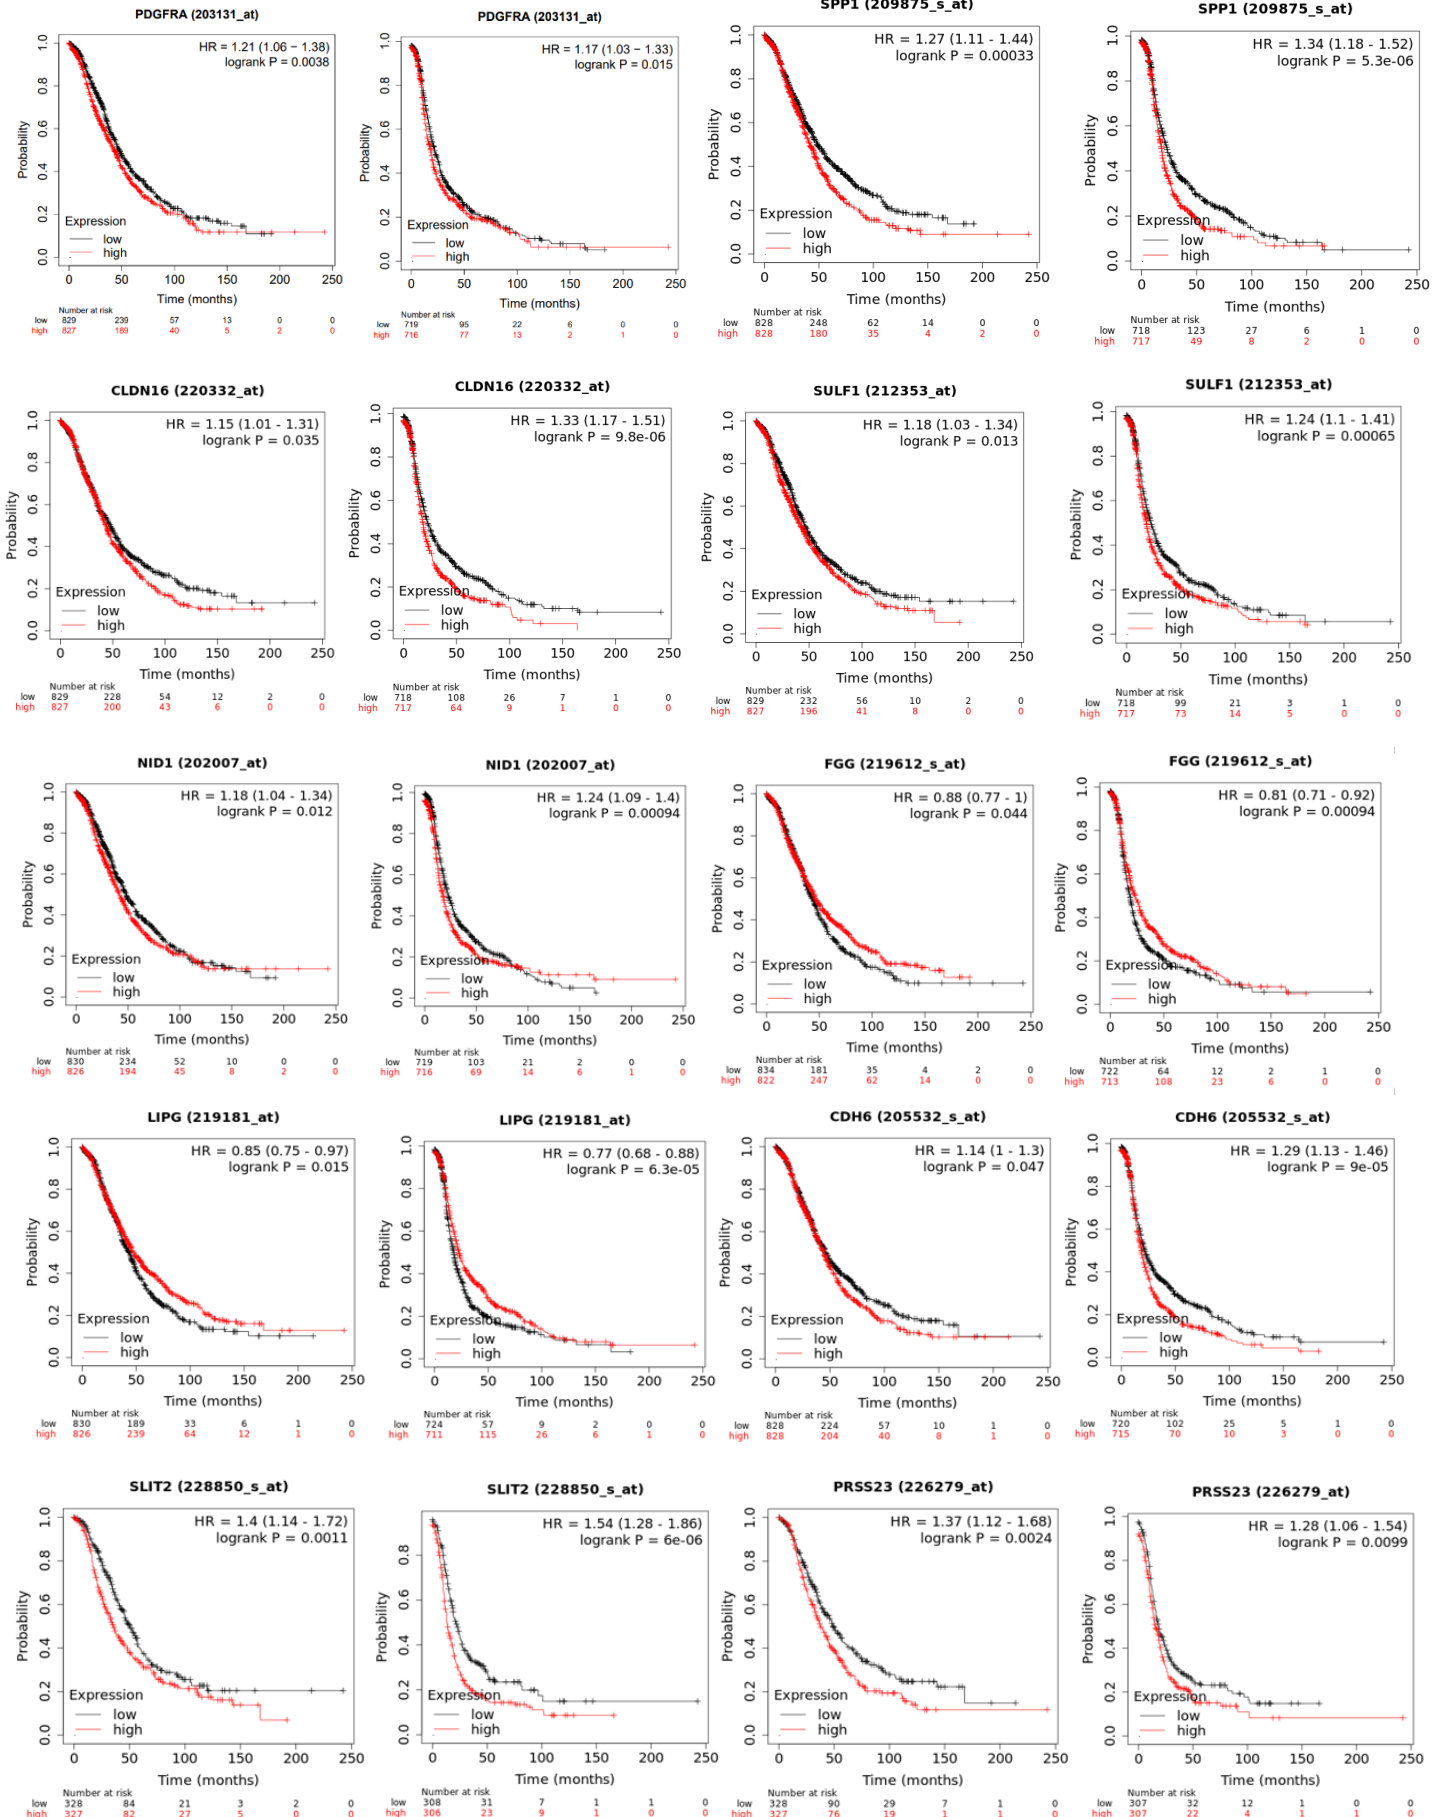

OS

PFS

OS

PFS

EFEMP1 (201843\_s\_at)

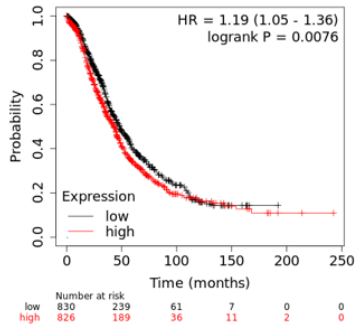

EFEMP1 (201843\_s\_at)

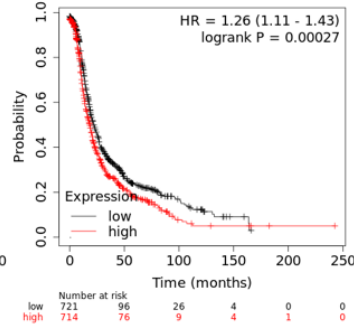

PDE1A (233547\_x\_at)

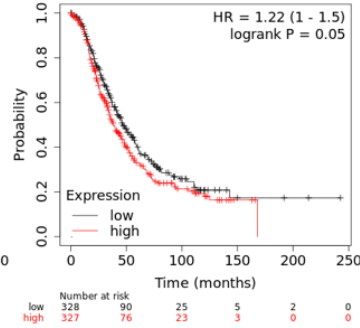

PDE1A (233547\_x\_at)

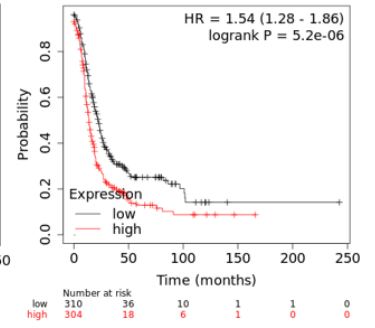

CRABP2 (202575\_at)

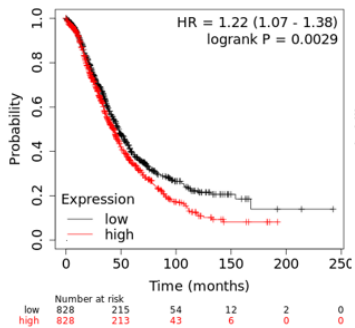

CRABP2 (202575\_at)

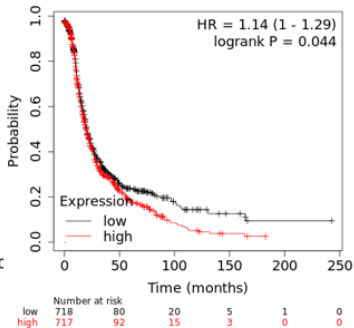

ATP11B (212536\_at)

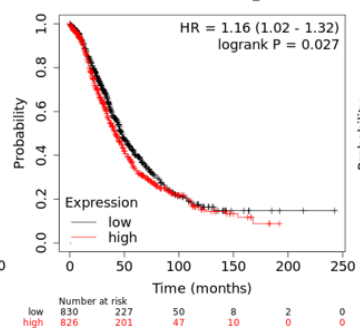

ATP11B (212536\_at)

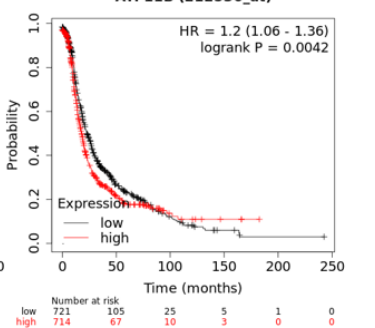

SYTL2 (232914\_s\_at)

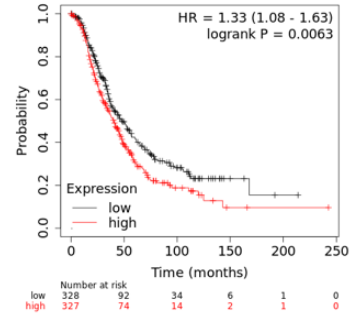

SYTL2 (232914\_s\_at)

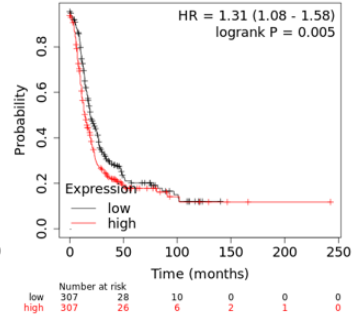

THBS1 (201110\_s\_at)

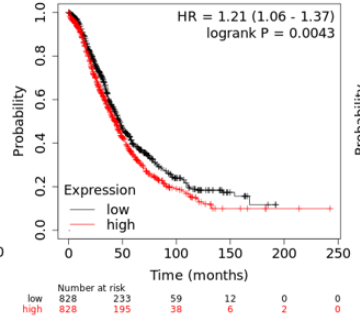

THBS1 (201110\_s\_at)

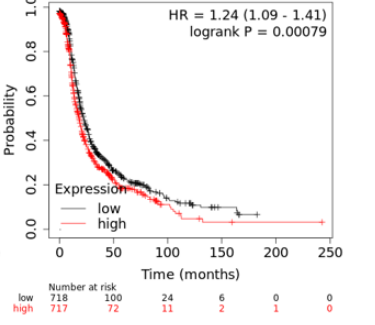

SACS (213262\_at)

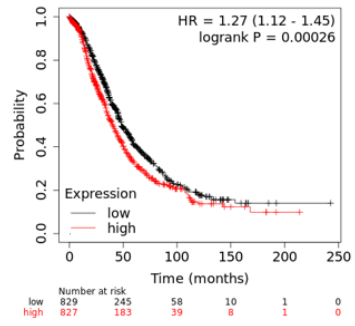

SACS (213262\_at)

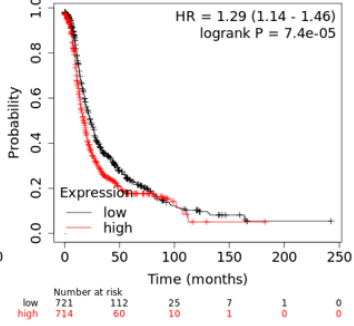

ARRDC3 (224797\_at)

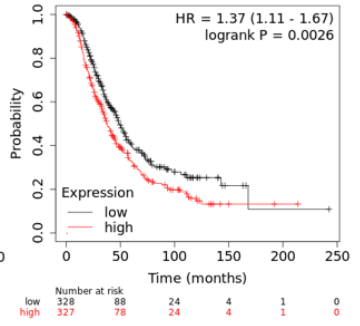

ARRDC3 (224797\_at)

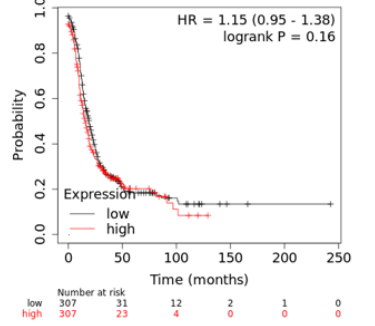

OS

PFS

OS

PFS

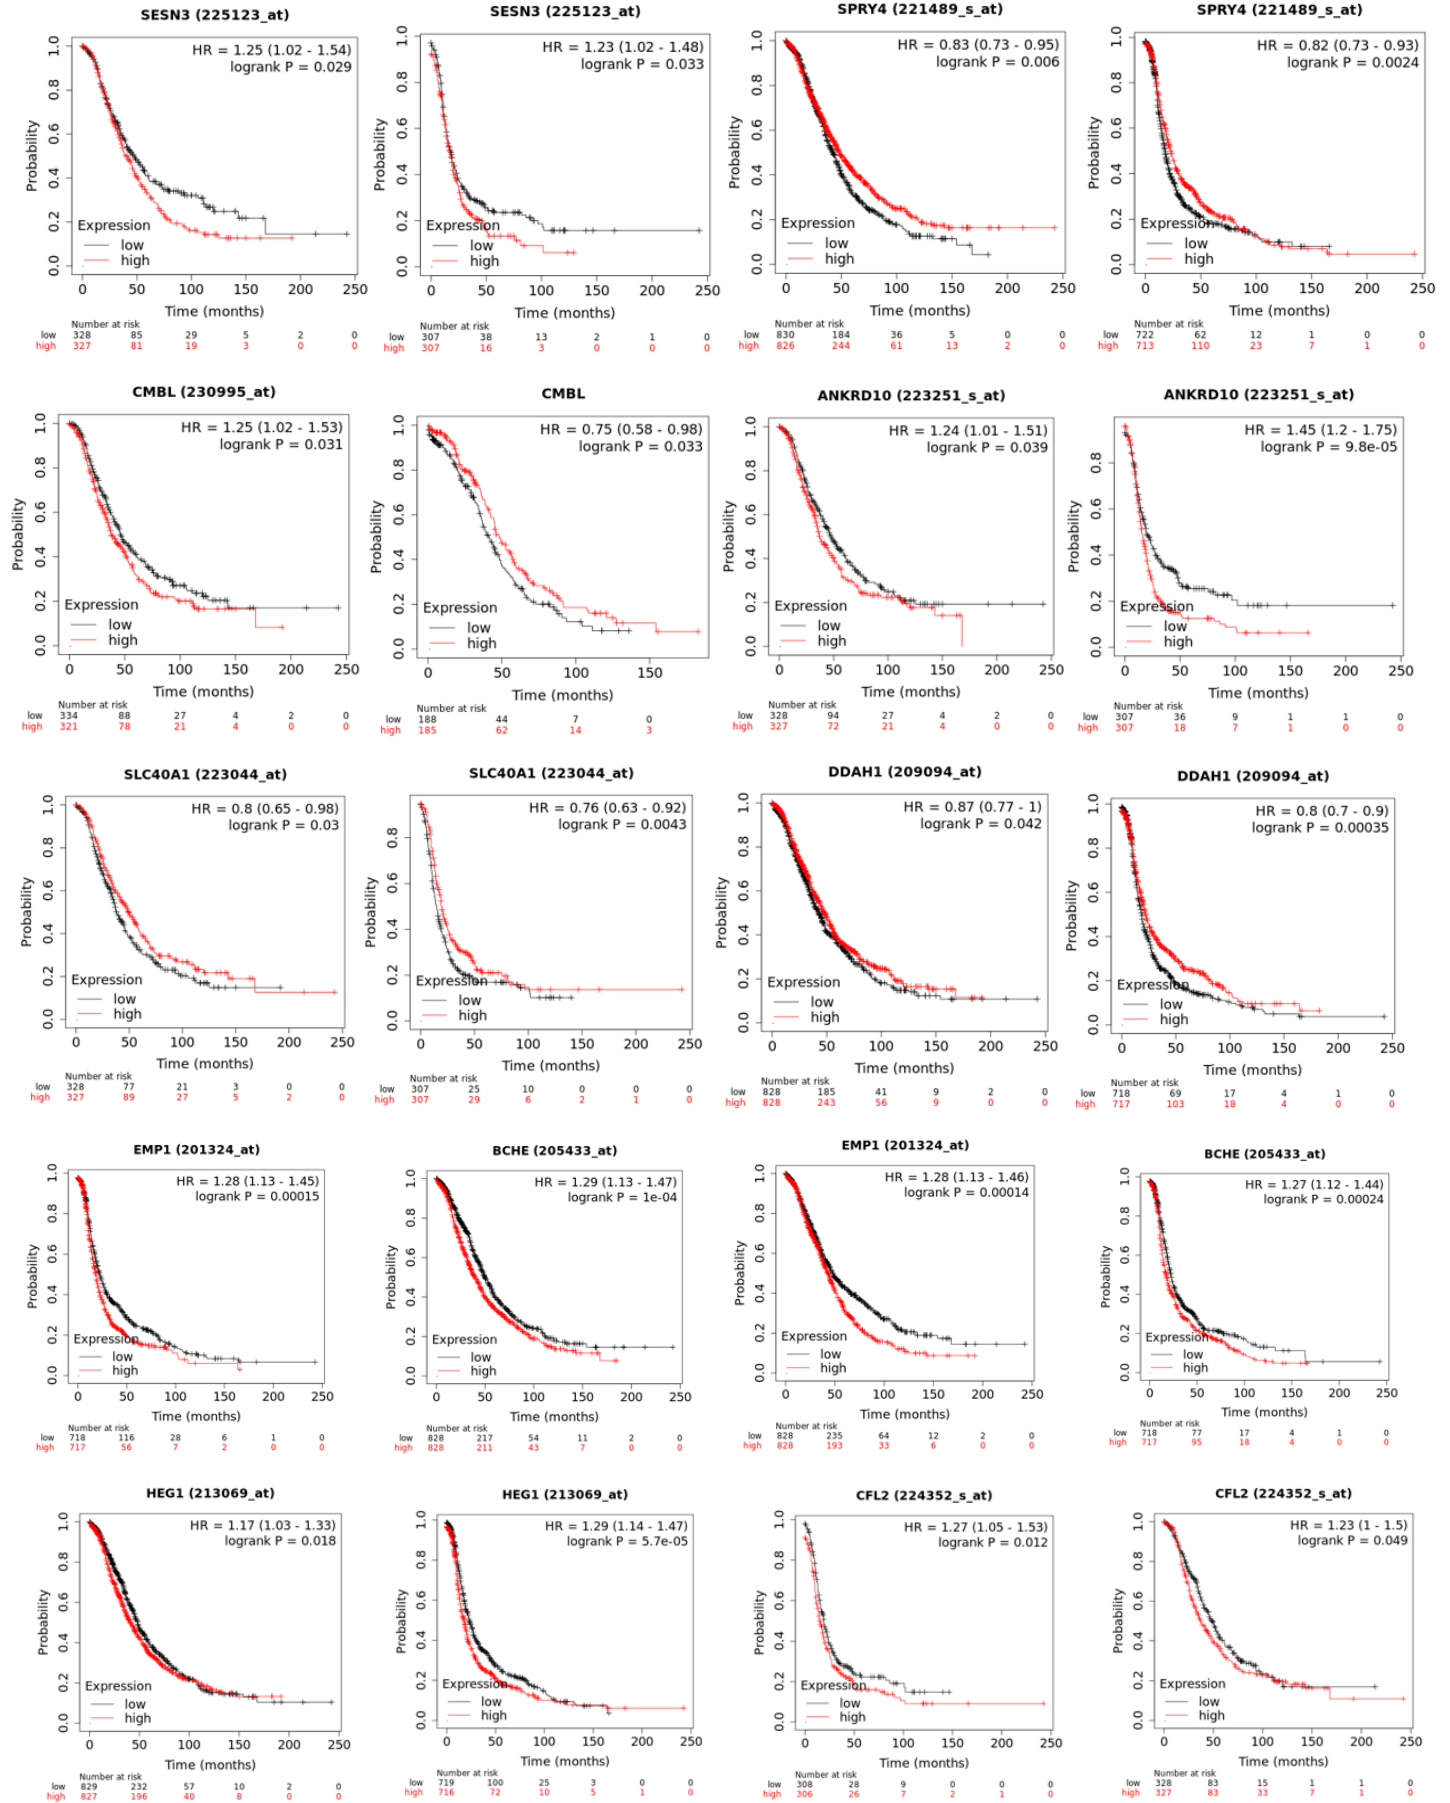

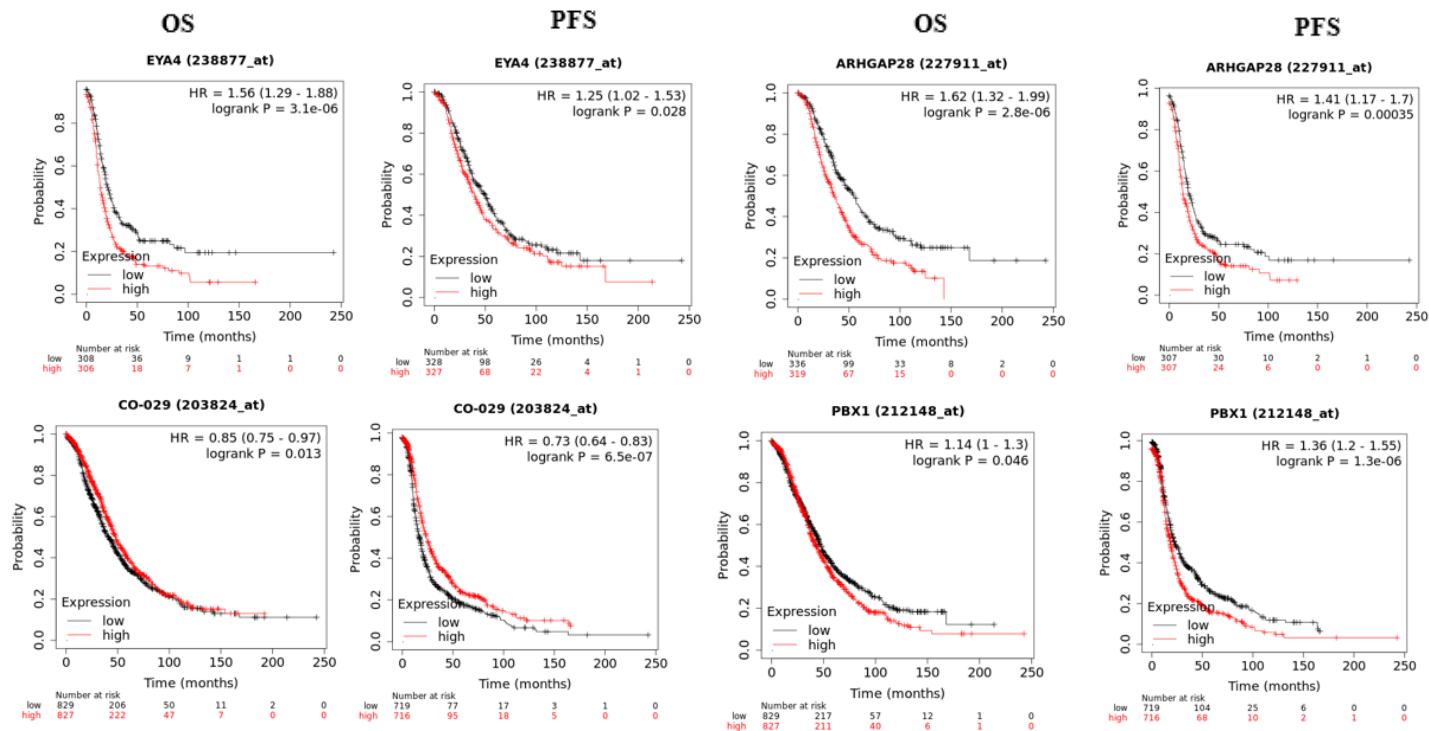

**Figure S1. Kaplan–Meier (KM) plots for gene expression-based overall survival (OS) and progression-free survival (PFS) analysis.** KM plots of ovarian cancer patients were generated using the KM plotter searchable database. The OS and PFS of patients with ovarian cancer are stratified by expression levels of the additional 57 clinically relevant genes in ovarian cancer. P-values < 0.05 were considered to be statistically significant.



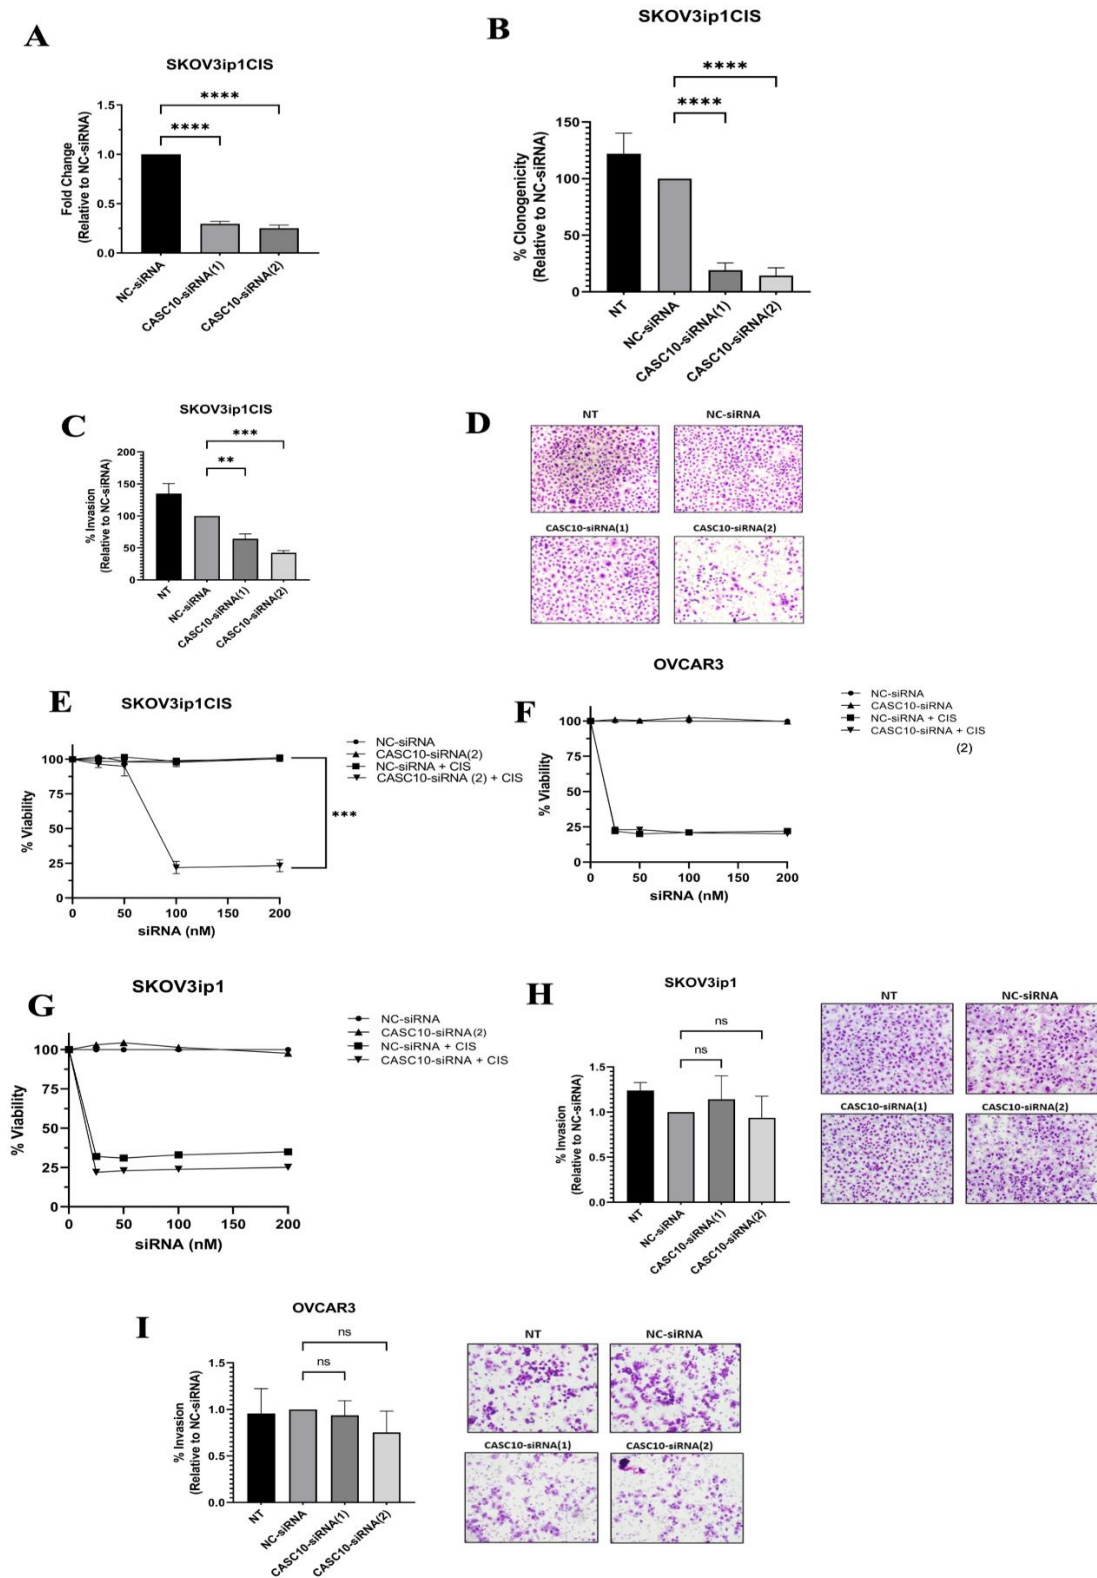

**Figure S2. siRNA-mediated CASC10 knockdown reduced cell growth, invasion, and viability in SKOV3ip1CIS.** (A) RT-qPCR following transfection of siRNA in SKOV3ip1CIS cells. (B) colony formation assay, and (C-D) invasion ability following siRNA transfections in SKOV3ip1CIS cells. (E) Cell viability following siRNA transfections in SKOV3ip1 cells. Cell viability was performed with and without CIS (2.5  $\mu$ M). (F-I) Cell viability and invasion following siRNA transfections in OVCAR3 and SKOV3ip1 cells. Mean  $\pm$  SEM is shown relative to NC-siRNA (\* $p$  < 0.05, \*\* $p$  < 0.01, \*\*\* $p$  < 0.001, and \*\*\*\* $p$  < 0.0001).

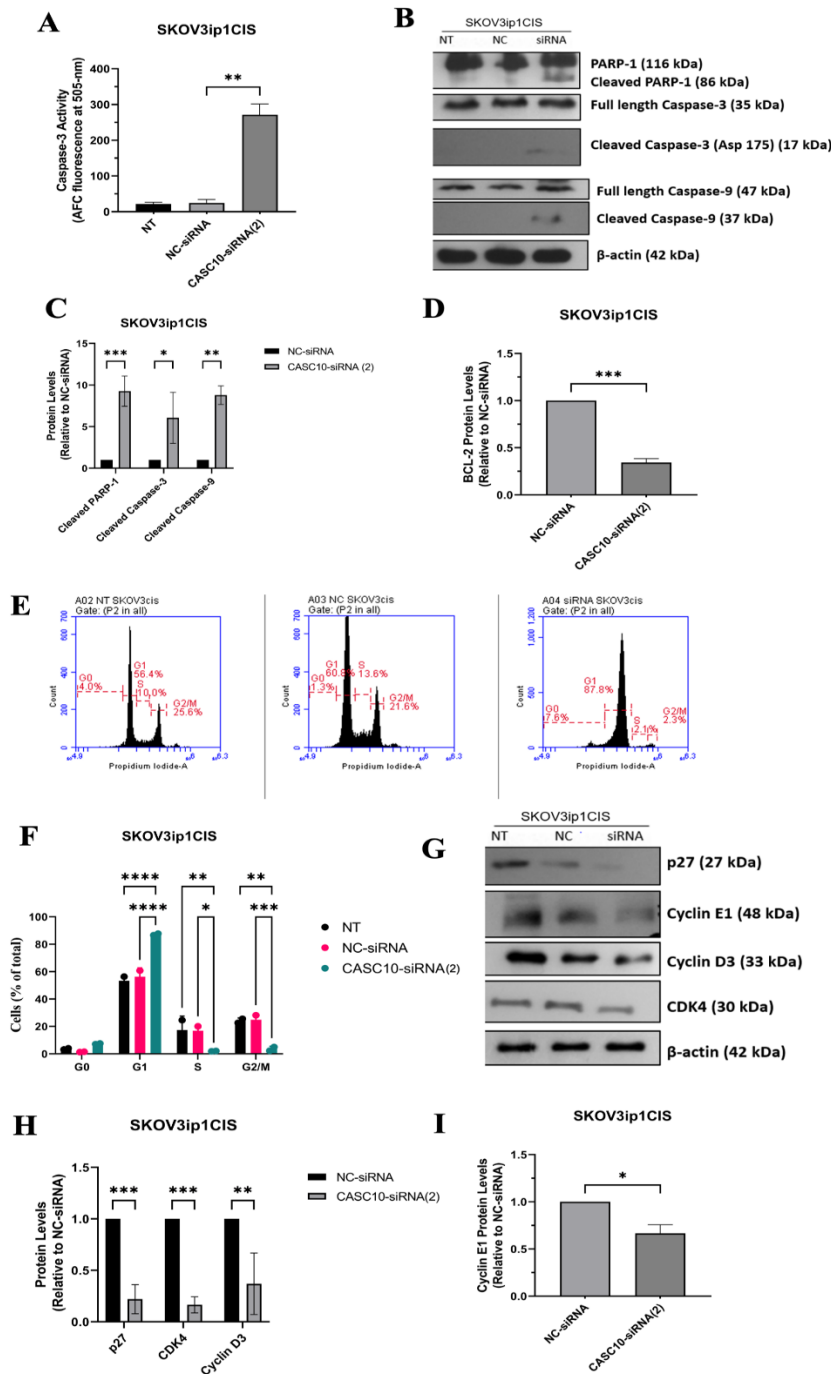

**Figure S3. CASC10 siRNA-mediated knockdown Induced Apoptosis and Cell Cycle Arrest in SKOV3ip1CIS.** SKOV3ip1CIS cells were transfected with 100 nM NC-siRNA or 100 nM CASC10-siRNA(2). **(A)** Caspase-3 fluorometric activity assay in SKOV3ip1CIS cells 72 hr after siRNA transfection. **(B)** Western blot analysis of apoptotic-related proteins. **(C-D)** Densitometric analysis of the band intensities shown in B. **(E)** Histogram showing cell cycle arrest at G0/G1 to S phase transition after CASC10-siRNA(2) transfection in SKOV3ip1CIS cells. **(F)** Quantification of the flow cytometry data shown in E. Values were expressed relative to NC-siRNA. **(G)** Western blot analysis of cell cycle-related proteins 48 hr after siRNA transfection. **(H-I)** Densitometric analysis of the band intensities shown in G. Mean  $\pm$  SEM is shown relative to NC-siRNA (\* $p$  < 0.05, \*\* $p$  < 0.01, \*\*\* $p$  < 0.001, and \*\*\*\* $p$  < 0.0001).

**A**

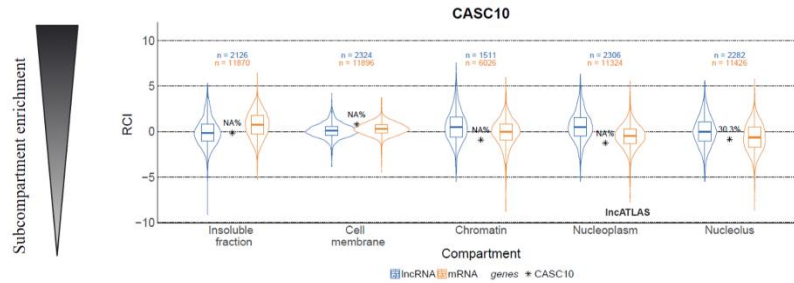

**B**

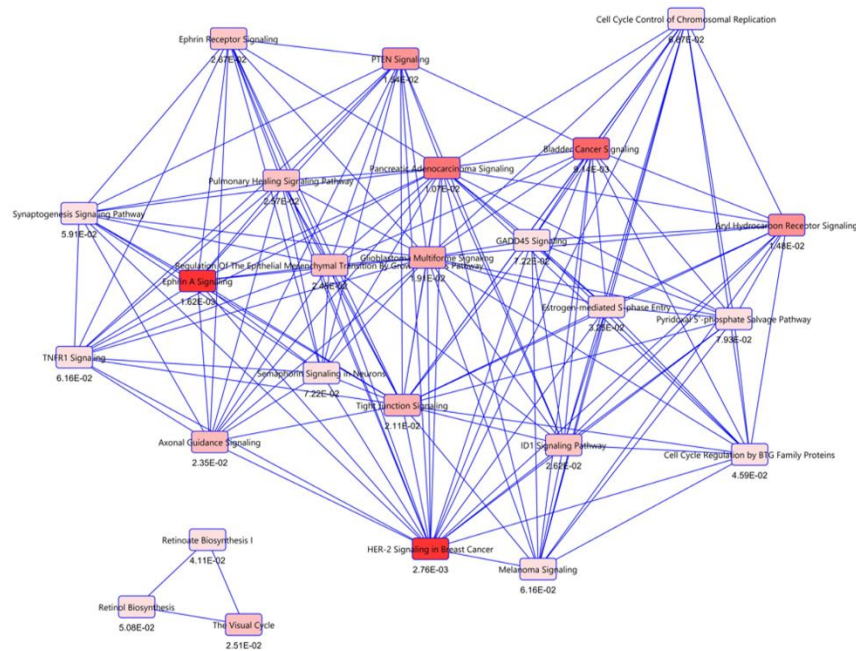

**Figure S4. (A)** Subcellular subcompartment analysis of CASC10 RNA levels in K562 cells. **(B)** Ingenuity Pathway Analysis (IPA) shows the additional top 25 canonical pathway interactions following siRNA-mediated knockdown CASC10 in OVCAR3CIS cells.



**Table S1.** List of the antibodies used for western blot analysis.

| Primary Antibodies | Company                 | Species | Dilution |
|--------------------|-------------------------|---------|----------|
| Caspase-9          | Cell Signaling (9502)   | Rabbit  | 1:500    |
| Caspase-3          | Cell Signaling (9665)   | Rabbit  | 1:500    |
| Cleaved Caspase-3  | Cell Signaling (9664)   | Rabbit  | 1:250    |
| Cleaved Caspase-9  | Cell Signaling (20750)  | Rabbit  | 1:250    |
| PARP-1             | Cell Signaling (46D11)  | Rabbit  | 1:1000   |
| BCL-2              | Abcam (7382)            | Mouse   | 1:1000   |
| CDK4               | Cell Signaling (D9G3D)  | Rabbit  | 1:500    |
| Cyclin E1          | Cell Signaling (HE12)   | Mouse   | 1:1000   |
| p27/Kip1           | Cell Signaling (D69C12) | Rabbit  | 1:500    |
| $\beta$ -actin     | Sigma                   | Mouse   | 1:10000  |
|                    |                         |         |          |

**Table S2.** Concentrations of cisplatin inhibiting 50% of cell viability. Incubation with cisplatin: 72-hr followed by Alamar Blue assay.

| Cell line   | IC <sub>50</sub> cisplatin (μM) |
|-------------|---------------------------------|
| A2780       | 0.5-0.8                         |
| A2780CP20   | 20-30                           |
| A2780CIS    | 4.3                             |
| OV90        | 3.5                             |
| OV90CIS     | 7.8                             |
| OVCAR3      | 2.8                             |
| OVCAR3CIS   | 7.5                             |
| SKOV3IP1    | 3.9                             |
| SKOV3IP1CIS | 7.3                             |

**Table S3.** List of the 414 differentially abundant RNA transcripts in cisplatin-sensitive vs. cisplatin-resistant HGSOC cells.

| <b>Gene Name</b> | <b>OV90log2FC<br/>(Resistant/Sensitive)</b> | <b>OVCAR3log2FC<br/>(Resistant/Sensitive)</b> |
|------------------|---------------------------------------------|-----------------------------------------------|
| BCAT1            | 2.849                                       | 4.562                                         |
| SH3BP4           | 3.63                                        | 3.794                                         |
| NABP1            | -2.426                                      | -5.027                                        |
| FGF2             | -5.443                                      | -2.098                                        |
| STARD4           | -4.152                                      | -3.39                                         |
| RGS2             | 2.609                                       | 4.942                                         |
| ID4              | -6.583                                      | -0.976                                        |
| PCYT1B           | -6.865                                      | -0.760                                        |
| THBS1            | 3.589                                       | 4.061                                         |
| LMO7             | 5.368                                       | 2.285                                         |
| TENM3            | -2.439                                      | -5.270                                        |
| AKAP12           | 3.951                                       | 3.783                                         |
| SYTL2            | -3.189                                      | -4.547                                        |
| CYP1B1           | 3.069                                       | 4.801                                         |
| F2RL1            | 3.652                                       | 4.226                                         |
| ATP11B           | -3.213                                      | -4.713                                        |
| OGFRL1           | -3.043                                      | -4.917                                        |
| SLC39A8          | -3.54                                       | -4.474                                        |
| TNFAIP2          | 6.296                                       | 1.946                                         |
| CRABP2           | -6.656                                      | -1.622                                        |
| PAX9             | -5.501                                      | -2.779                                        |
| NLGN1            | -3.428                                      | -5.05                                         |
| ANKRD1           | -2.663                                      | -5.829                                        |
| PDE1A            | 0.964                                       | 7.528                                         |
| QPRT             | 5.511                                       | 3.016                                         |
| TMEM30B          | -6.499                                      | -2.105                                        |
| GDF15            | 4.966                                       | 3.659                                         |
| SP3P             | -3.396                                      | -5.275                                        |
| ITM2B            | 4.733                                       | 3.947                                         |
| CA2              | 6.825                                       | 1.868                                         |
| PCDH17           | -4.544                                      | -4.152                                        |
| BRINP3           | -6.77                                       | -1.955                                        |
| AKAP6            | -4.71                                       | -4.035                                        |
| ANTXR2           | 7.893                                       | 0.904                                         |
| MMP16            | -6.169                                      | -2.687                                        |
| NRP1             | 7.714                                       | 1.173                                         |
| A2M              | 7.737                                       | 1.177                                         |

|               |        |        |
|---------------|--------|--------|
| EFEMP1        | 8.179  | 0.765  |
| ABCC2         | 7.886  | 1.073  |
| ZDBF2         | -4.461 | -4.553 |
| PRSS23        | 6.641  | 2.391  |
| MUC15         | -6.231 | -2.856 |
| ARL4A         | -3.648 | -5.454 |
| SLIT2         | -7.061 | -2.093 |
| MID1          | -3.178 | -6.01  |
| FAM198B       | 4.885  | 4.342  |
| CCL26         | 8.556  | 0.711  |
| CDH6          | 8.573  | 0.742  |
| FAS           | -5.727 | -3.592 |
| PROM1         | 7.886  | 1.436  |
| LIPG          | 3.67   | 5.678  |
| NAALAD2       | 2.989  | 6.403  |
| LIN28A        | 1.378  | 8.027  |
| MMRN1         | 0.752  | 8.664  |
| HIST1H2BH     | 0.755  | 8.683  |
| RBM47         | 6.572  | 2.887  |
| SLC7A7        | 7.533  | 1.93   |
| FGG           | 8.522  | 1.004  |
| ZFP42         | 0.876  | 8.785  |
| GLDC          | -6.067 | -3.595 |
| NRK           | 0.705  | 9.013  |
| JAG1          | 8.212  | 1.523  |
| ISL1          | -4.549 | -5.2   |
| LAMC2         | 8.494  | 1.367  |
| NID1          | 5.37   | 4.504  |
| RP3-332B22.1  | -6.373 | -3.508 |
| FRY           | -5.233 | -4.715 |
| ZPLD1         | 1.86   | 8.16   |
| LHX8          | 1.083  | 8.985  |
| MSX1          | 1.8    | 8.323  |
| CD24          | 8.619  | 1.508  |
| ADGRL2        | -4.868 | -5.26  |
| POU1F1        | -6.368 | -3.783 |
| LAMA2         | -4.911 | -5.244 |
| RP11-115D19.1 | 1.062  | 9.22   |
| MBNL2         | 6.276  | 4.028  |
| ADAM28        | 8.719  | 1.589  |

|           |        |        |
|-----------|--------|--------|
| CRISPLD1  | -6.566 | -3.755 |
| TM4SF1    | 8.555  | 1.792  |
| C3orf58   | -5.97  | -4.393 |
| AARD      | -6.38  | -3.992 |
| C1S       | 6.658  | 3.802  |
| RHOBTB1   | 3.937  | 6.563  |
| SULF1     | -6.791 | -3.781 |
| HIST1H3G  | 1.632  | 8.958  |
| ACTA2     | -7.269 | -3.338 |
| SEMA3D    | -6.206 | -4.422 |
| CLDN16    | -5.611 | -5.292 |
| SPP1      | 7.785  | 3.136  |
| GRID2     | -5.303 | -5.68  |
| ARID5B    | 3.283  | 7.713  |
| ANK3      | 3.591  | 7.446  |
| IQGAP2    | 6.336  | 4.8    |
| GNAT3     | -7.125 | -4.09  |
| HDAC9     | 3.747  | 7.556  |
| TOX       | -6.581 | -4.901 |
| MMP3      | -6.707 | -4.834 |
| VGLL3     | -6.179 | -5.417 |
| RGS1      | 2.701  | 8.926  |
| GPRIN3    | 2.905  | 8.771  |
| MLIP      | -6.497 | -5.213 |
| SIM1      | -6.263 | -5.48  |
| SDPR      | -6.553 | -5.299 |
| NRG1      | -6.513 | -5.384 |
| BICC1     | 4.73   | 7.199  |
| SYNPO2    | -6.801 | -5.135 |
| SEMA3E    | -7.43  | -4.543 |
| SLC8A1    | 3.705  | 8.342  |
| TENM2     | -7.826 | -4.225 |
| HIST1H3C  | 8.647  | 3.475  |
| TMEM2     | 5.24   | 7.101  |
| AMIGO2    | 3.685  | 8.893  |
| NTS       | 6.103  | 6.532  |
| WDR72     | 8.587  | 4.104  |
| NUPR1     | 6.008  | 6.844  |
| CAV2      | 8.594  | 4.388  |
| PDGFRA    | 8.246  | 4.799  |
| TGFB2     | 5.758  | 7.377  |
| HIST1H2BE | 5.774  | 7.457  |



|           |        |        |
|-----------|--------|--------|
| SATB1     | 4.759  | 8.473  |
| CARD16    | 4.871  | 8.633  |
| FUCA2     | 8.236  | 5.388  |
| MEST      | 5.238  | 8.612  |
| HSPA1A    | 7.348  | 6.879  |
| HIST1H2BI | 6.462  | 8.298  |
| UNC13C    | 7.1    | 8.031  |
| HIST1H2AL | 7.753  | 7.459  |
| ZNF532    | 7.147  | 8.119  |
| TES       | 7.492  | 7.874  |
| HIST1H3I  | 7.912  | 7.533  |
| HIST1H4D  | 7.189  | 8.266  |
| HIST1H1B  | 7.685  | 8.058  |
| DKK1      | 7.451  | 8.426  |
| FTH1      | 2.155  | 1.679  |
| PNMAL1    | -3.203 | -0.632 |
| SACS      | -2.808 | -1.027 |
| MAP1A     | 2.177  | 1.674  |
| ARRDC3    | -1.682 | -2.252 |
| SESN3     | -0.533 | -3.407 |
| ARL6IP5   | -2.926 | -1.04  |
| KLF3      | 2.697  | 1.272  |
| TMCO3     | 2.469  | 1.514  |
| ABRACL    | -2.029 | -1.963 |
| CASK      | 2.897  | 1.102  |
| CRIM1     | -2.361 | -1.655 |
| GJA1      | -3.285 | -0.789 |
| SORT1     | 2.224  | 1.856  |
| ADAM15    | -3.681 | -0.428 |
| FAM234B   | -2.457 | -1.682 |
| U1        | -3.686 | -0.496 |
| HMGB1P6   | -3.098 | -1.088 |
| OCLN      | -0.438 | -3.757 |
| HSPA4L    | -2.824 | -1.39  |
| SPRY4     | 2.373  | 1.907  |
| EMP3      | 2.442  | 1.88   |
| CMBL      | 3.615  | 0.71   |
| ANKRD10   | 2.715  | 1.7    |
| SLC40A1   | 3.524  | 0.932  |
| DDAH1     | -3.514 | -0.965 |

|          |        |        |
|----------|--------|--------|
| TNFRSF19 | -2.188 | -2.369 |
| KLHL5    | 1.834  | 2.727  |
| SLC9A7   | -0.966 | -3.632 |
| CCDC138  | -2.347 | -2.258 |
| SSX2IP   | -1.997 | -2.616 |
| BCHE     | -3.329 | -1.31  |
| HSPG2    | 3.957  | 0.747  |
| PLAUR    | 3.63   | 1.076  |
| MEIS2    | 2.529  | 2.209  |
| PIK3CA   | -2.523 | -2.357 |
| PSD3     | -2.396 | -2.506 |
| TTC39A   | -3.818 | -1.105 |
| ERRFI1   | 3.773  | 1.328  |
| GCAT     | -3.073 | -2.125 |
| EMP1     | -4.032 | -1.205 |
| LIF      | -3.039 | -2.24  |
| SLC12A6  | -2.707 | -2.612 |
| MYO5A    | -3.998 | -1.396 |
| IRS1     | 4.252  | 1.218  |
| CFL2     | -3.496 | -1.976 |
| USP53    | -1.397 | -4.087 |
| MID1IP1  | 3.254  | 2.232  |
| HEG1     | 4.39   | 1.12   |
| NUP210   | -3.884 | -1.669 |
| FTL      | 4.429  | 1.148  |
| INSIG2   | 2.282  | 3.31   |
| ATP11A   | 4.262  | 1.333  |
| ARMCX6   | -2.951 | -2.659 |
| KCNJ2    | -0.944 | -4.697 |
| KITLG    | 4.409  | 1.269  |
| TBC1D32  | -3.796 | -1.935 |
| ACSL1    | -4.365 | -1.368 |
| CITED2   | -2.153 | -3.59  |
| LGR4     | 3.476  | 2.299  |
| PCDH9    | -2.982 | -2.859 |
| PCGF5    | -0.707 | -5.141 |
| APOC1    | 4.111  | 1.749  |
| KANK1    | -0.771 | -5.112 |
| ADGRG6   | -0.969 | -4.949 |
| ARHGAP28 | -4.771 | -1.238 |
| PAX6     | -1.634 | -4.429 |
| ABCA1    | 1.447  | 4.634  |

|         |        |        |
|---------|--------|--------|
| CPED1   | 0.989  | 5.124  |
| PLAU    | 4.736  | 1.385  |
| ABCA3   | -5.623 | -0.53  |
| EYA4    | -5.638 | -0.581 |
| CFH     | -3.3   | -2.926 |
| TOM1L2  | -3.066 | -3.174 |
| ARAP2   | -1.707 | -4.549 |
| AMOT    | 4.067  | 2.21   |
| IL1RAP  | -1.151 | -5.142 |
| TSPAN8  | 5.502  | 0.827  |
| CALCRL  | -5.567 | -0.867 |
| PBX1    | 4.161  | 2.288  |
| CASC10  | -6.033 | -0.497 |
| HOXB9   | -1.628 | -4.934 |
| MTUS1   | 2.154  | 4.438  |
| FLRT3   | -1.312 | -5.297 |
| SIX1    | -5.996 | -0.722 |
| OXCT1   | -5.918 | -0.829 |
| MPDZ    | -5.772 | -0.996 |
| DNAJC22 | 5.946  | 0.843  |
| GNAI1   | -1.418 | -5.373 |
| HIC2    | 5.971  | 0.861  |
| RGS5    | 6.339  | 0.575  |
| PCDH7   | -1.697 | -5.227 |
| ADAMTS3 | -6.244 | -0.715 |
| NFKBIZ  | 4.895  | 2.12   |
| SNRPN   | -6.44  | -0.589 |
| ELOVL4  | -4.846 | -2.184 |
| VCAN    | 1.392  | 5.639  |
| MET     | 4.825  | 2.207  |
| CDH12   | 6.2    | 0.865  |
| SLC7A2  | 1.712  | 5.473  |
| LRP1B   | -2.117 | -5.17  |
| APOE    | 5.742  | 1.55   |
| F2R     | 3.526  | 3.801  |
| NEFH    | -6.276 | -1.054 |
| RNLS    | -2.753 | -4.604 |
| PLB1    | 5.712  | 1.654  |
| XK      | -2.238 | -5.142 |
| RUNX2   | 0.686  | 6.85   |
| TP63    | -4.481 | -3.09  |
| PAG1    | 4.002  | 3.577  |
| ATP8B1  | 5.935  | 1.666  |

|          |        |        |
|----------|--------|--------|
| TOR4A    | 6.637  | 0.965  |
| TDRP     | -6.636 | -1.074 |
| RERG     | 3.067  | 4.657  |
| HMCN1    | 5.949  | 1.803  |
| SULF2    | 5.871  | 1.882  |
| SCIN     | -2.704 | -5.048 |
| C10orf10 | 5.244  | 2.526  |
| SOSTDC1  | 3.635  | 4.183  |
| MGAT3    | 4.748  | 3.083  |
| C2orf72  | 5.504  | 2.334  |
| TMCC3    | 5.595  | 2.255  |
| S1PR1    | 0.768  | 7.114  |
| PALD1    | -7.191 | -0.707 |
| MCOLN2   | -6.298 | -1.61  |
| PROCR    | 2.216  | 5.769  |
| CCDC74A  | -6.246 | -1.759 |
| CFP      | 6.971  | 1.163  |
| PDGFC    | -3.449 | -4.711 |
| RNF144B  | -6.53  | -1.645 |
| VIL1     | 6.498  | 1.683  |
| NYNRIN   | 4.242  | 3.95   |
| TMEM178A | -4.283 | -3.915 |
| VTN      | 7.014  | 1.203  |
| TGFBR3   | 3.754  | 4.464  |
| ADGRB3   | -6.687 | -1.532 |
| ZNF415   | 4.641  | 3.591  |
| ZNF704   | 2.274  | 5.973  |
| SULT1A1  | 4.823  | 3.435  |
| CACNA1H  | -3.147 | -5.151 |
| ESPN     | -4.683 | -3.694 |
| NUDT11   | -6.273 | -2.126 |
| LPAR1    | -3.441 | -5.001 |
| CCDC74B  | -6.883 | -1.585 |
| CDH10    | -7.619 | -0.872 |
| COL17A1  | 6.168  | 2.348  |
| NR3C1    | 7.019  | 1.502  |
| FAM184A  | -3.73  | -4.797 |
| RGL1     | 4.965  | 3.578  |
| KIF1A    | -7.199 | -1.433 |
| HPGD     | 7.569  | 1.277  |
| SLITRK6  | -6.079 | -2.77  |
| TMEM184A | -3.868 | -4.986 |

|                     |        |        |
|---------------------|--------|--------|
| <b>MMP14</b>        | 7.021  | 1.885  |
| <b>LRRC17</b>       | 7.498  | 1.424  |
| <b>ABCB1</b>        | -4.17  | -4.788 |
| <b>SH2D5</b>        | -6.523 | -2.51  |
| <b>CFTR</b>         | 7.291  | 1.814  |
| <b>NRXN1</b>        | -5.791 | -3.448 |
| <b>PIK3C2G</b>      | 7.315  | 2.103  |
| <b>PPP1R1C</b>      | 4.773  | 4.724  |
| <b>FAT3</b>         | 7.963  | 1.588  |
| <b>TRPM3</b>        | 1.672  | 7.897  |
| <b>SLC5A5</b>       | 7.696  | 1.898  |
| <b>RP1-261D10.2</b> | -5.256 | -4.339 |
| <b>IGFBP4</b>       | 6.89   | 2.723  |
| <b>SYNE4</b>        | -5.479 | -4.176 |
| <b>SLC16A14</b>     | -6.305 | -3.386 |
| <b>TFEC</b>         | 5.917  | 3.817  |
| <b>EPAS1</b>        | 6.717  | 3.019  |
| <b>FBXL7</b>        | -7.228 | -2.513 |
| <b>NLGN4X</b>       | 0.932  | 8.871  |
| <b>LINC01351</b>    | -6.664 | -3.153 |
| <b>PCLO</b>         | -6.521 | -3.312 |
| <b>BST2</b>         | 3.65   | 6.185  |
| <b>GRIK1</b>        | 2.112  | 7.739  |
| <b>LSAMP</b>        | 8.005  | 1.852  |
| <b>DISC1FP1</b>     | -5.6   | -4.293 |
| <b>NPNT</b>         | 7.795  | 2.108  |
| <b>HIST1H4L</b>     | 8.824  | 1.158  |
| <b>PTGIS</b>        | 7.141  | 2.896  |
| <b>OTOA</b>         | 1.426  | 8.664  |
| <b>KCNT2</b>        | -5.007 | -5.086 |
| <b>ARL10</b>        | 3.691  | 6.456  |
| <b>PPARGC1A</b>     | 8.514  | 1.695  |
| <b>DNAJC6</b>       | -4.159 | -6.053 |
| <b>MXRA8</b>        | 6.126  | 4.138  |
| <b>RUNX1</b>        | 8.628  | 1.643  |
| <b>PDLIM3</b>       | -4.761 | -5.558 |
| <b>ONECUT2</b>      | 8.279  | 2.046  |
| <b>EPHA5</b>        | -7.009 | -3.321 |
| <b>HIST1H2BB</b>    | 5.909  | 4.44   |
| <b>IGFBP3</b>       | -7.315 | -3.037 |



|             |        |        |
|-------------|--------|--------|
| CCDC110     | -5.467 | -4.905 |
| FZD8        | 4.698  | 5.787  |
| SLITRK5     | -7.027 | -3.462 |
| VWDE        | -5.336 | -5.231 |
| TRPV2       | 6.268  | 4.389  |
| TBX15       | -6.049 | -4.642 |
| CFAP47      | -5.781 | -4.912 |
| LRG1        | 7.975  | 2.723  |
| EPDR1       | -6.742 | -3.985 |
| TPH2        | -2.766 | -8.037 |
| HIST1H3J    | 7.052  | 3.78   |
| TRHDE       | -3.021 | -7.824 |
| PTPRD       | 3.016  | 7.876  |
| MYEOV       | 8.133  | 2.771  |
| ZNF788      | 1.749  | 9.172  |
| VEGFC       | -6.108 | -4.837 |
| RASSF9      | 5.881  | 5.08   |
| CAV1        | 5.354  | 5.612  |
| USP44       | 7.722  | 3.286  |
| CDCP1       | 8.535  | 2.478  |
| TNS3        | 7.512  | 3.554  |
| FAM110C     | -7.228 | -3.839 |
| SNTG1       | -6.821 | -4.248 |
| FMN1        | -6.023 | -5.088 |
| FAM111B     | 6.931  | 4.201  |
| GS1-600G8.3 | -6.687 | -4.473 |
| PDE4B       | -6.284 | -5.017 |
| SPAG6       | -7.059 | -4.258 |
| SLC6A15     | -5.882 | -5.452 |
| DCDC1       | -6.34  | -5.004 |
| ELF3        | 7.918  | 3.49   |
| GAS1        | -6.48  | -5.013 |
| NID2        | 5.152  | 6.351  |
| EOMES       | 3.634  | 7.871  |
| INPP1       | 8.383  | 3.132  |
| GSG1        | -6.509 | -5.125 |
| PRRX1       | -7.367 | -4.314 |
| SV2A        | 3.705  | 7.979  |
| SATB2       | -6.778 | -4.926 |
| TMEM207     | -5.756 | -5.968 |
| ZNF521      | 2.909  | 8.816  |
| LIN7A       | -7.011 | -4.716 |

|               |        |        |
|---------------|--------|--------|
| MAGI2-AS3     | -7.043 | -4.79  |
| KIFC3         | 7.583  | 4.277  |
| AF121898.3    | -6.78  | -5.114 |
| ADAMTS9       | 8.532  | 3.404  |
| GALNT13       | -7.169 | -4.782 |
| ACSS3         | -6.822 | -5.131 |
| MUSK          | -6.5   | -5.476 |
| SLC9A9        | -6.374 | -5.631 |
| CASP4         | 5.813  | 6.255  |
| CPA4          | 7.797  | 4.435  |
| RP11-865I6.2  | -7.152 | -5.089 |
| TMEFF2        | -8.146 | -4.125 |
| PRKG1         | 5.656  | 6.652  |
| RP11-255H23.2 | 3.494  | 8.884  |
| NRG3          | 9.075  | 3.33   |
| ZNF595        | 4.361  | 8.078  |
| SLC44A5       | 7.692  | 4.886  |
| AGMO          | 5.557  | 7.102  |
| PDGFD         | 5.224  | 7.436  |
| SOX9          | 8.431  | 4.234  |
| ELFN1         | 4.608  | 8.097  |
| MGST2         | 8.215  | 4.519  |
| TGFB2-AS1     | 5.167  | 7.593  |
| RP11-2E11.6   | 4.689  | 8.176  |
| PTPRQ         | -6.108 | -6.981 |
| OLFML3        | 4.882  | 8.284  |
| PLBD1         | 5.84   | 7.566  |
| AVPR1A        | 8.135  | 5.296  |
| ZNF841        | 7.715  | 5.867  |
| ESRRG         | 5.439  | 8.144  |
| ZNF681        | 5.459  | 8.4    |
| FLNC          | 5.98   | 7.962  |
| HSPB1         | 6.297  | 7.656  |
| S100A11       | 7.449  | 6.726  |
| TMEM156       | 8.629  | 5.626  |
| GPX1          | 7.616  | 6.787  |

|                  |       |       |
|------------------|-------|-------|
| <b>TGFB1I1</b>   | 7.35  | 7.098 |
| <b>MDFIC</b>     | 8.361 | 6.556 |
| <b>ALDH2</b>     | 7.644 | 7.304 |
| <b>HIST1H4A</b>  | 8.143 | 6.869 |
| <b>ZNF320</b>    | 6.905 | 8.371 |
| <b>ZNF468</b>    | 8.079 | 7.213 |
| <b>C14orf169</b> | 7.129 | 8.282 |
| <b>HIST1H3A</b>  | 8.105 | 7.314 |
| <b>ZNF718</b>    | 6.764 | 8.705 |

**Table S4.** CASC10 downstream signaling pathways generated by IPA.

| Network | Diseases and Function                                                                                                             | Molecules                                                                                                                                                                                                                                                         |
|---------|-----------------------------------------------------------------------------------------------------------------------------------|-------------------------------------------------------------------------------------------------------------------------------------------------------------------------------------------------------------------------------------------------------------------|
| 1       | <ul style="list-style-type: none"><li>Cell Death and Survival</li><li>Cellular Movement</li><li>Developmental Disorders</li></ul> | TPPP, PYM1, CD151, MAGOH, NRSN1, GLYR1, TMEM64, CELF1, PTBP1, MYC, SERINC3, Cyclin D, SNHG3, EPHA4, CDC42, MERTK, CDK4, PDLIM3, CDCA7L, TNF, CNN1, CDC42EP4, AQP3, TRIM5, FSH, ARHGAP1, IFRD2, WT1, SRY, SLC20A1, EFNA1, TNFRSF6B, TMBIM6, ETV5                   |
| 2       | <ul style="list-style-type: none"><li>Cell Cycle and Chromosomal Regulation</li><li>Cancer and Cell Survival</li></ul>            | PCDH7, COL4A1, SMAD6, ANXA9, COL6A2, COL4A2, COL5A1, NFIB, HMGA1, ESTROGEN RECEPTOR, NORAD, EGLN2, ABCA1, TIMP2, KRT18, PDGFA, TGFBR2, FGFR3, CRNDE, LTB, SP1, RHOB, LIPA, NCOR2, GADD45B, , CR2, RB1, NOX4, SIN3A, CDC37, KDM5A, SIN3B, MORF4L1, MORF4L2, MRFAP1 |

A

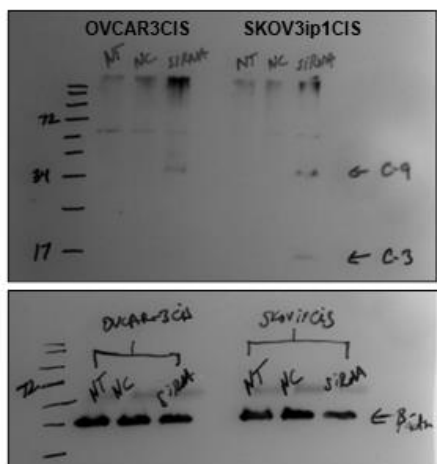

B

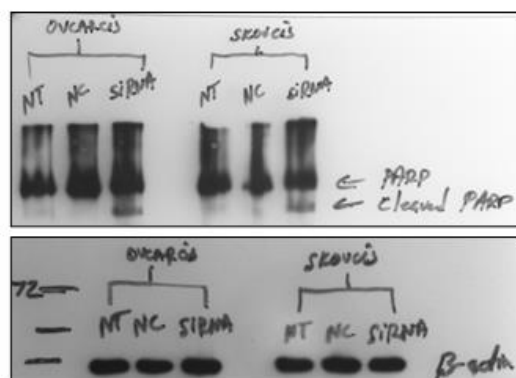

C

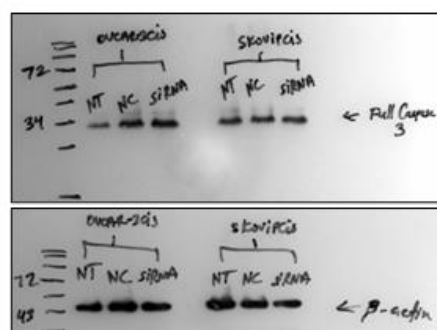

D

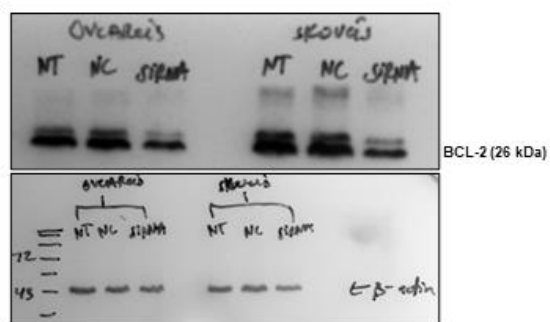

E

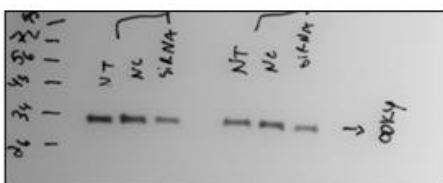

F

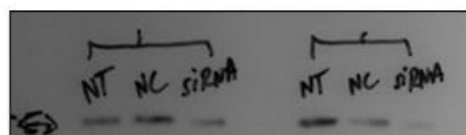

G

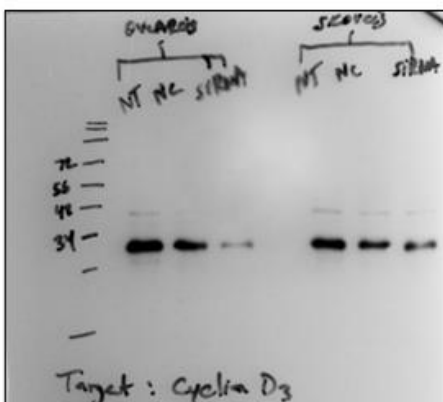

H

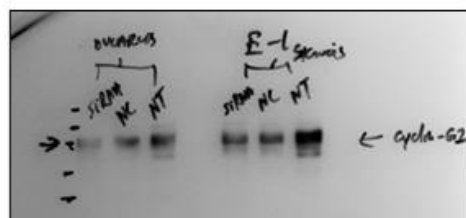



**Figure S5. Western blot images.** Protein bands and molecular markers are shown for (A) Cleaved Caspase-3 and Cleaved Caspase-9, (B) PARP and Cleaved-PARP, (C) Full Caspase-3, and (D) BCL-2. A-D corresponds to Figure 4B and Figure S4B. (E) CDK4, (F) p27, (G) Cyclin D3, (H) Cyclin E1. E-H corresponds to Figure 4G and Figure S4G.
